# Supplementary material for: U6 snRNA expression prevents toxicity in TDP-43-knockdown cells
Source: PubMed Central journal article supplement (PMC5681290; doi:10.1371/journal.pone.0187813), 2017-11-10
Supplement: pone.0187813.s001.pdf [file pone.0187813.s001.pdf]

A

| Synthetic oligonucleotide for U6 snRNA expression plasmid |                                                                                                                                          |
|-----------------------------------------------------------|------------------------------------------------------------------------------------------------------------------------------------------|
| Sense                                                     | 5'-AGATCCCCGTGCTCGCTTCGGCAGCACATATACTAAAATTGGAACGATACAGAG<br>AAGATTTAGCATGGCCCCTGCGCAAGGATGACACGCAAATTCGTGAAGCGTTCAT<br>ATTTTAAGCTT-3'   |
| Antisense                                                 | 5'-AAGCTTAAAAATATGGAACGCTTCACGAATTTGCGTGTCATCCTTGCGCAGGGG<br>CCATGCTAAATCTTCTCTGTATCGTTCCAATTTTAGTATATGTGCTGCCGAAGCGAG<br>CACGGGGATCT-3' |

B

| Primers for PCR |                               |                                |
|-----------------|-------------------------------|--------------------------------|
| Transcript name | Forward primer                | Reverse primer                 |
| U6 snRNA        | 5'-CTCGCTTCGGCAGCACATATACT-3' | 5'-ACGCTTCACGAATTTGCGTGTC-3'   |
| RPS18           | 5'-GGGCGGAGATATGCTCATGTG-3'   | 5'-TCTGGGATCTTGTACTGTCGT-3'    |
| 7SL RNA         | 5'-GGAGTTCTGGGCTGTAGTGC-3'    | 5'-ATCAGCACGGGAGTTTTGAC-3'     |
| 18S rRNA        | 5'-GTAACCCGTTGAACCCATT-3'     | 5'-CCATCCAATCGGTAGTAGCG-3'     |
| snoRNA 202      | 5'-AGTACTTTTGAACCTTTTCC-3'    | †Commercial primer             |
| Sort1           | 5'-CAGGAGACAAATGCCAAGGT-3'    | 5'-TGGCCAGGATAATAGGGACA-3'     |
| Dnajc5          | 5'-CTCTATGTGGCGGAGCAGTT-3'    | 5'-GCTGTATGACGATCGGTGTG-3'     |
| Poldip3/Skar    | 5'-AGTACAGGATGCCAGGGAGA-3'    | 5'-GGAGAACAGGAGCGGTGTAG-3'     |
| Madd            | 5'-CTGAGCTAGGCGGTGAGTTCCT-3'  | 5'-GTAATTGTGGCTCACCATTCTTTA-3' |

## S1 Table: List of synthetic oligonucleotides and PCR primers.

(A) Synthetic oligonucleotides used to construct the U6 snRNA expression plasmid. (B) PCR primers used to detect transcripts and small RNAs. † denotes a commercially available primer included in the Mir-X First Strand Synthesis Kit (TaKaRa).
